# Supplementary material for: Cobalt-Doped Carbon Nitride Frameworks Obtained from Calcined Aromatic Polyimines as Cathode Catalyst of Anion Exchange Membrane Fuel Cells
Source: MDPI journal article supplement (doi:10.3390/membranes12010074), 2022-01-06
Supplement: s1 [file s1]

# Supplementary Materials

## Cobalt doped carbon nitride frameworks obtained from calcined aromatic polyimines as cathode catalyst of anion exchanged membrane fuel cells

Tar-Hwa Hsieh <sup>1</sup>, Sin-Nan Chen <sup>1</sup>, Yen-Zen Wang <sup>2,\* †</sup>, Ko-Shan Ho <sup>1,\* †</sup>, Rong-Kuan Jhuang <sup>1</sup>, Lin-Chia Ho <sup>3</sup>

<sup>1</sup> Department of Chemical and Materials Engineering, National Kaohsiung University of Science and Technology, 415, Chien-Kuo Road, Kaohsiung 80782, Taiwan; [thh@nkust.edu.tw](mailto:thh@nkust.edu.tw); [f108146125@nkust.edu.tw](mailto:f108146125@nkust.edu.tw)

<sup>2</sup> Department of Chemical and Materials Engineering, National Yu-Lin University of Science & Technology, 123, Sec. 3, University Rd., Dou-Liu City, Yun-Lin 64301, Taiwan

<sup>3</sup> Tri-Service General Hospital, 325 Sec. 2 Chengong Rd., Neihu District, Taipei City 11490, Taiwan; [404010073@mail.ndmctsgh.edu.tw](mailto:404010073@mail.ndmctsgh.edu.tw)

\* Correspondence: [wangzen@yuntech.edu.tw](mailto:wangzen@yuntech.edu.tw) (Y.-Z.W.); [hks@nkust.edu.tw](mailto:hks@nkust.edu.tw) (K.-S.H.)

† These authors equally contributed to this work.

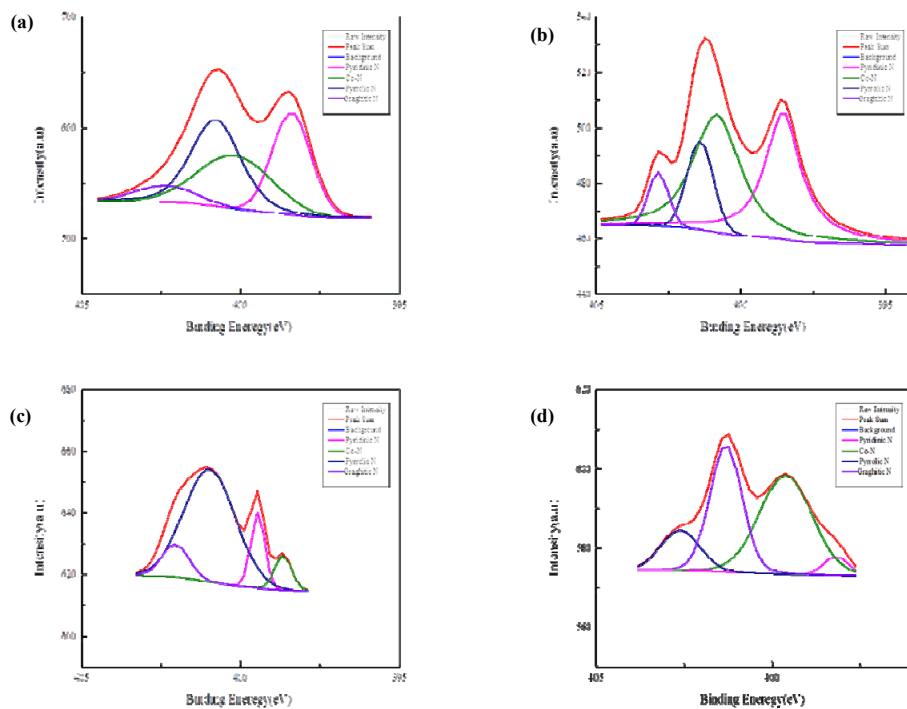

**Figure S1.** N<sub>1s</sub> XPS of CoNC prepared at various temperatures (a) 700A600 (b) 800A700 (c) 900A800 (d) 1000A900.

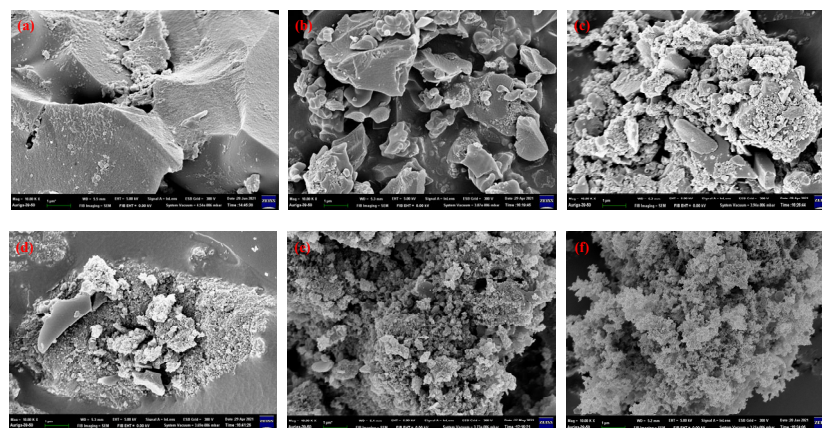

**Figure S2.** SEM micropictures of (a) APIM-1000 (b) CoNC 600A500 (c) CoNC 700A600 (d) CoNC 800A700 (e) CoNC 900A800 (f) CoNC 1000A900.

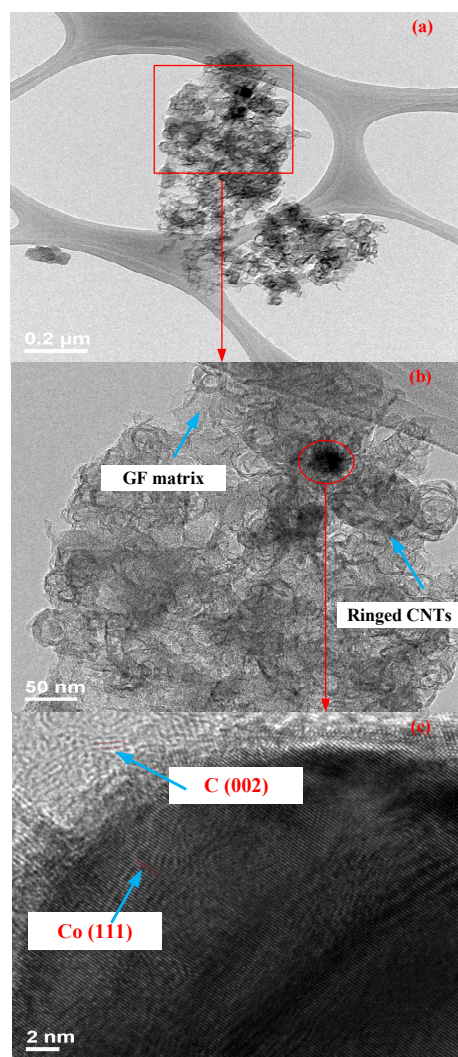

**Figure S3.** TEM micropictures of CoNC1000A900 taken at different magnifications.

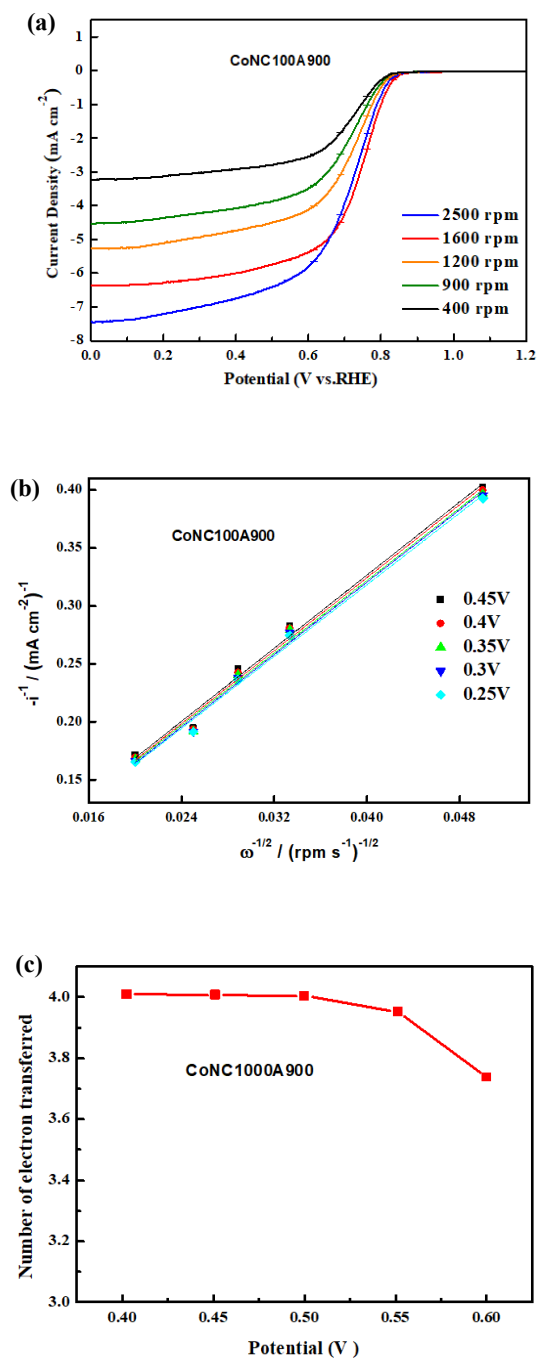

**Figure S4.** (a) LSV curves measured at different rpm (b) K-L lines calculated from LSV curves (c) numbers of transferred at cathode with different potentials.
